# Supplementary material for: Dietary Protein, Fiber and Coffee Are Associated with Small Intestine Microbiome Composition and Diversity in Patients with Liver Cirrhosis
Source: MDPI journal article supplement (doi:10.3390/nu12051395), 2020-05-13
Supplement: s1 [file s1]

Supplementary Table 1. Comparison of participant characteristics between those with and without diet information

| <b>Demographics</b>                   | <b>Microbiome-only</b> | <b>Microbiome-diet</b> |
|---------------------------------------|------------------------|------------------------|
| Number                                | 114                    | 51                     |
| Sex, n (%)                            |                        |                        |
| Male                                  | 79 (69%)               | 29 (57%)               |
| Female                                | 35 (31%)               | 22 (43%)               |
| Baseline age, mean (st dev)           | 59 (13)                | 57 (11)                |
| Race, n (%)                           |                        |                        |
| American Indian/Alaskan native        | 3 (3%)                 | 0                      |
| Asian                                 | 5 (4%)                 | 2 (4%)                 |
| Black of African American             | 11 (10%)               | 3 (6%)                 |
| More than one race                    | 2 (2%)                 | 1 (2%)                 |
| White                                 | 93 (82%)               | 45 (88%)               |
| Ethnicity, n (%)                      |                        |                        |
| Hispanic or Latino                    | 42 (37%)               | 14 (27%)               |
| Not Hispanic or Latino                | 72 (63%)               | 37 (73%)               |
| Cirrhosis etiology, n (%)             |                        |                        |
| HCV                                   | 42 (37%)               | 15 (29%)               |
| HBV                                   | 2 (2%)                 | 1 (2%)                 |
| ALD                                   | 30 (26%)               | 12 (24%)               |
| NASH                                  | 20 (18%)               | 8 (16%)                |
| AIH                                   | 10 (9%)                | 3 (6%)                 |
| PBC                                   | 1 (1%)                 | 2 (4%)                 |
| PSC                                   | 0                      | 7 (14%)                |
| Other                                 | 9 (8%)                 | 3 (6%)                 |
| Cirrhosis Complications, n (%)        |                        |                        |
| Hepatic Encephalopathy                | 42 (30%)               | 10 (20%)               |
| Esophageal Varices                    | 60 (54%)               | 37 (73%)               |
| Ascites                               | 49 (44%)               | 27 (53%)               |
| Baseline clinical labs, mean (st dev) |                        |                        |
| AFP                                   | 9.8 (35.0)             | 4.7 (4.3)              |
| AFP <20ng/mL (%), n (%)               | 78 (96%)               | 41 (98%)               |
| AFP 20-400 ng/mL (%), n (%)           | 3 (4%)                 | 1 (2%)                 |
| Creatinine                            | 1.1 (1.1)              | 1 (0.9)                |
| Sodium                                | 138 (3.6)              | 138 (3.7)              |
| Albumin                               | 3.8 (0.7)              | 3.7 (0.7)              |
| Bilirubin                             | 1.5 (2.0)              | 1.8 (2.0)              |
| ALP                                   | 130 (122)              | 136 (74)               |
| AST                                   | 51 (55)                | 42 (23)                |
| ALT                                   | 41 (51)                | 33 (18)                |
| Platelets                             | 125 (67)               | 125 (78)               |
| INR                                   | 1.2 (0.2)              | 1.2 (0.2)              |

|                             |            |            |
|-----------------------------|------------|------------|
| PT                          | 13.7 (3.0) | 13 (3.0)   |
| MELD                        | 10.9 (5.4) | 11.5 (5.7) |
| Baseline medications, n (%) |            |            |
| PPI                         | 47 (41%)   | 23 (45%)   |
| Lactulose                   | 29 (25%)   | 9 (18%)    |
| Rifaximin                   | 21 (18%)   | 7 (14%)    |

Supplementary Table 2. Select characteristics of study participants by protein, fiber, and coffee intake

|                                | Protein <sup>1</sup> |          | Fiber <sup>2</sup>          |                         | Coffee <sup>3</sup> |          |
|--------------------------------|----------------------|----------|-----------------------------|-------------------------|---------------------|----------|
| Demographics                   | Low and mid          | High     | Not meeting recommendations | Meeting recommendations | Not frequent        | Frequent |
| Number                         | 24                   | 27       | 36                          | 15                      | 29                  | 22       |
| Sex, n (%)                     |                      |          |                             |                         |                     |          |
| Male                           | 14 (58%)             | 15 (56%) | 22 (61%)                    | 7 (47%)                 | 17 (59%)            | 12 (55%) |
| Female                         | 10 (42%)             | 12 (44%) | 14 (39%)                    | 8 (53%)                 | 12 (41%)            | 10 (45%) |
| Baseline age, mean (st dev)    | 54 (13)              | 59 (9)   | 56 (12)                     | 59 (9)                  | 53 (12)             | 62 (8)   |
| Race, n (%)                    |                      |          |                             |                         |                     |          |
| White                          | 21 (88%)             | 24 (89%) | 33 (92%)                    | 12 (80%)                | 27 (93%)            | 18 (82%) |
| Non-White                      | 3 (12%)              | 3 (11%)  | 3 (8%)                      | 3 (20%)                 | 2 (7%)              | 4 (18%)  |
| Ethnicity, n (%)               |                      |          |                             |                         |                     |          |
| Hispanic or Latino             | 7 (29%)              | 7 (26%)  | 11 (31%)                    | 3 (20%)                 | 7 (24%)             | 7 (32%)  |
| Not Hispanic or Latino         | 17 (71%)             | 20 (74%) | 25 (69%)                    | 12 (80%)                | 22 (76%)            | 15 (68%) |
| Cirrhosis etiology, n (%)      |                      |          |                             |                         |                     |          |
| HCV/HBV                        | 6 (25%)              | 10 (37%) | 12 (33%)                    | 4 (27%)                 | 8 (28%)             | 8 (36%)  |
| ALD                            | 7 (29%)              | 5 (19%)  | 9 (25%)                     | 3 (20%)                 | 8 (28%)             | 4 (18%)  |
| NASH                           | 2 (8%)               | 6 (22%)  | 5 (14%)                     | 3 (20%)                 | 2 (7%)              | 6 (27%)  |
| PSC                            | 4 (17%)              | 3 (11%)  | 4 (11%)                     | 3 (20%)                 | 6 (21%)             | 1 (5%)   |
| Other                          | 5 (21%)              | 3 (11%)  | 6 (17%)                     | 2 (13%)                 | 5 (16%)             | 3 (14%)  |
| Cirrhosis Complications, n (%) |                      |          |                             |                         |                     |          |
| Hepatic Encephalopathy         | 7 (29%)              | 3 (11%)  | 6 (17%)                     | 4 (27%)                 | 6 (21%)             | 4 (18%)  |
| Esophageal Varices             | 20 (83%)             | 17 (63%) | 27 (75%)                    | 10 (67%)                | 21 (72%)            | 16 (73%) |
| Ascites                        | 14 (58%)             | 13 (48%) | 20 (56%)                    | 7 (47%)                 | 16 (55%)            | 11 (50%) |

Abbreviations: HEI, healthy eating index; HCV, hepatitis C virus; HBV, hepatitis B virus; ALD, alcoholic liver disease; NASH, non-alcoholic steatohepatitis; AIH, autoimmune hepatitis; PBC, primary biliary cirrhosis; PSC, primary sclerosing cholangitis; <sup>1</sup>Protein (low and mid=lowest and middle tertiles based on HEI-2010, high=highest tertile based on the HEI-2010); <sup>2</sup>Fiber adequacy is based on USDA recommendation of 14 grams/kcal; <sup>3</sup>Not frequent coffee intake is < 5 cups/week, frequent coffee intake is ≥ 5 cups/week;

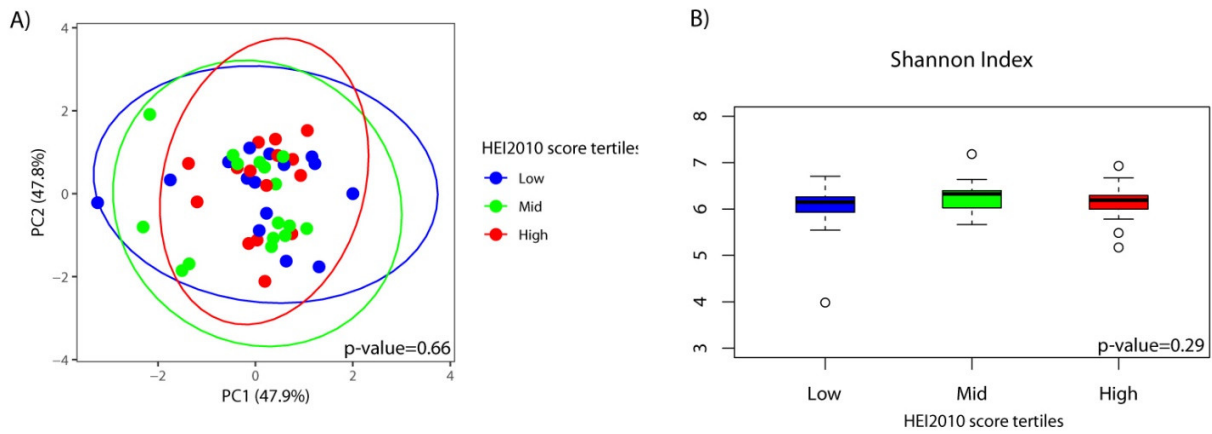

**Supplementary Figure 1:** (A) Principal coordinate analysis plot of the microbiome colored by HEI2010 score tertiles and encircled by 99% confidence interval ellipses. (B) Box plot of microbial diversity by Shannon Index (richness/evenness) grouped by HEI2010 score tertiles.
